# Supplementary material for: Metabolic Impacts of Using Nitrogen and Copper-Regulated Promoters to Regulate Gene Expression in Neurospora crassa
Source: PubMed Central journal article supplement (PMC4555226; doi:10.1534/g3.115.020073), 2015-07-20
Supplement: supp_g3.115.020073_FigureS3.pdf [file supp_g3.115.020073_FigureS3.pdf]

**Figure S3**

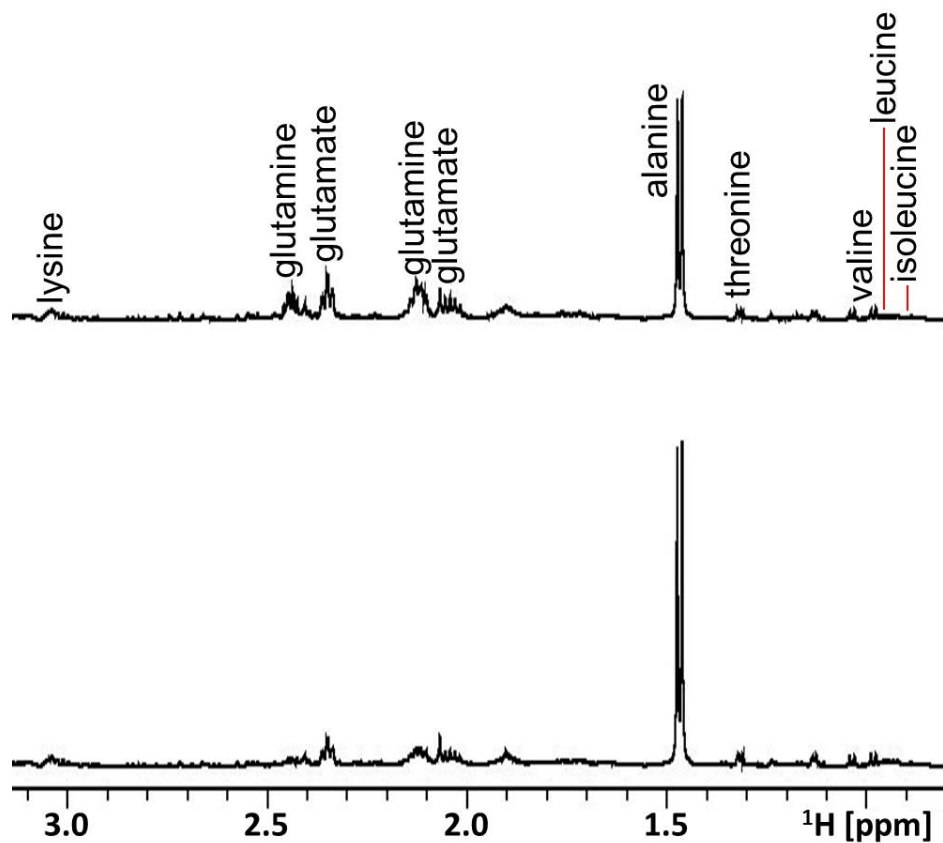

**Figure S3. Expansion of the spectra of pnt-6\_1.5 cultured on Gln (top) and nitrate (bottom) at lower vertical scale to highlight differences in the intensity the Ala resonance. The increase in the intensity of the Gln and Glu resonances can also be clearly seen in the top spectrum.**
