# Supplementary material for: Metabolic Impacts of Using Nitrogen and Copper-Regulated Promoters to Regulate Gene Expression in Neurospora crassa
Source: PubMed Central journal article supplement (PMC4555226; doi:10.1534/g3.115.020073), 2015-07-20
Supplement: supp_g3.115.020073_FigureS4.pdf [file supp_g3.115.020073_FigureS4.pdf]

Figure S4

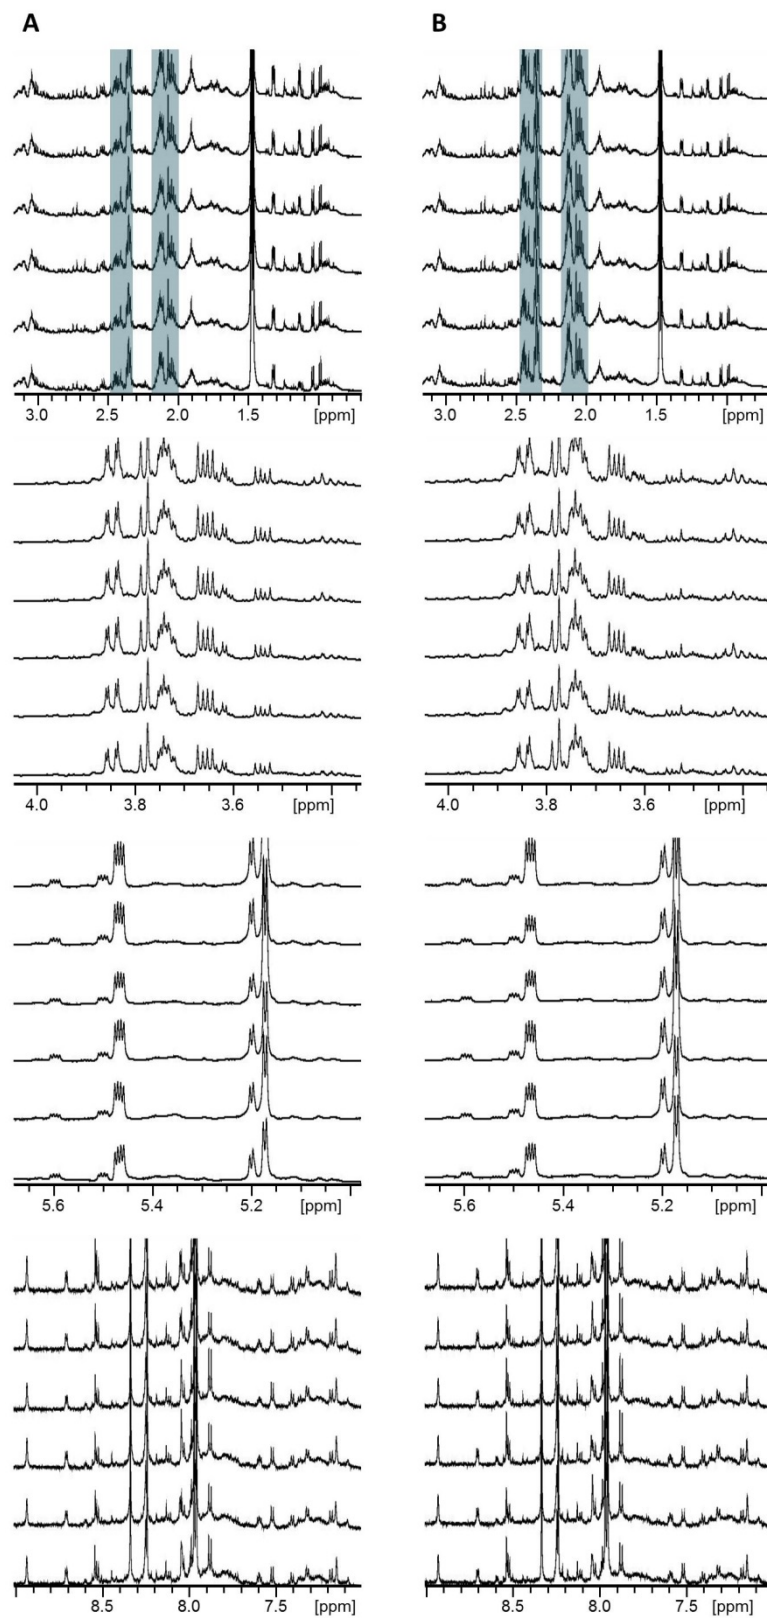

**Figure S4. Overlays of the  $^1\text{H}$  NMR spectra for all six replicates of strain pnit-6\_1.5.** The resonances of Gln and Glu are highlighted in blue. Each spectral region is scaled to compensate for differences in resonance intensity.

**A. Spectra measured for biological replicates of pnit-6\_1.5 cultured on VM-nitrate.**

**B. Spectra measured for biological replicates of pnit-6\_1.5 cultured on VM-Gln.** The resonances of Gln and Glu are significantly more intense in these spectra than in **A**.
