# Supplementary material for: Metabolic Impacts of Using Nitrogen and Copper-Regulated Promoters to Regulate Gene Expression in Neurospora crassa
Source: PubMed Central journal article supplement (PMC4555226; doi:10.1534/g3.115.020073), 2015-07-20
Supplement: supp_g3.115.020073_FigureS5.pdf [file supp_g3.115.020073_FigureS5.pdf]

**Figure S5**

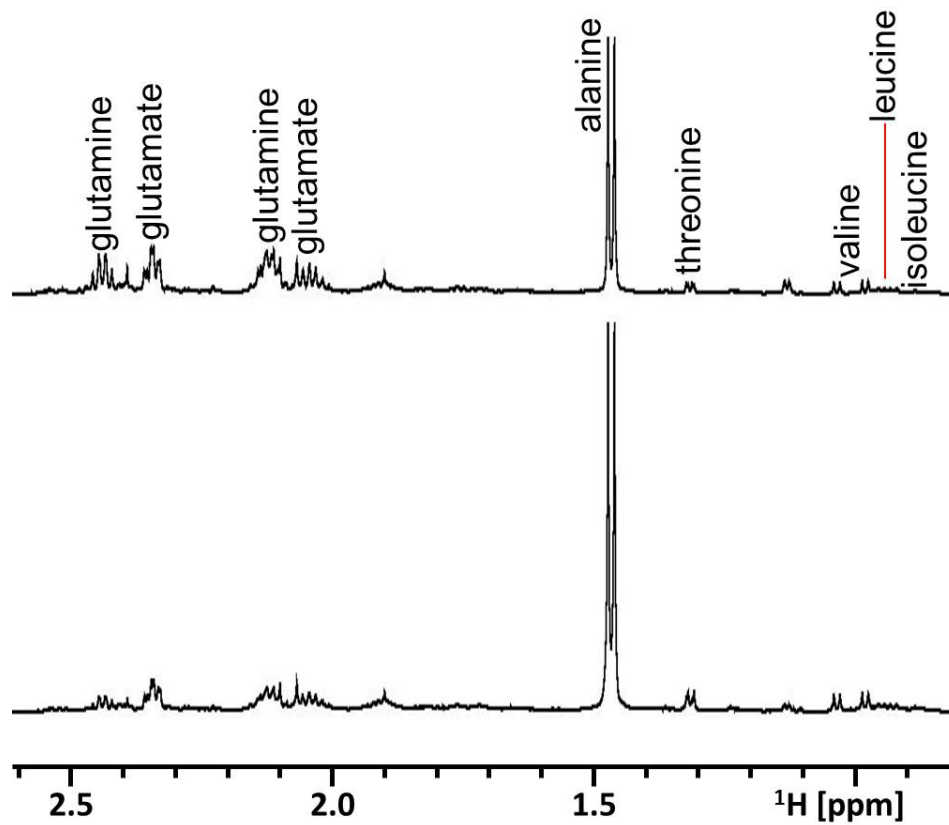

**Figure S5. Expansion of the spectra of wild-type *N. crassa* (WT) cultured on Gln (top) and nitrate (bottom).** The different growth conditions produce similar metabolic profiles for wild type strain 74-OR23-IVA as were observed for pnit-6\_1.5 (Fig. S3); namely higher levels of Gln and Glu and lower levels of Ala when grown using glutamine as the nitrogen source.
