# Supplementary material for: Metabolic Impacts of Using Nitrogen and Copper-Regulated Promoters to Regulate Gene Expression in Neurospora crassa
Source: PubMed Central journal article supplement (PMC4555226; doi:10.1534/g3.115.020073), 2015-07-20
Supplement: supp_g3.115.020073_FigureS6.pdf [file supp_g3.115.020073_FigureS6.pdf]

Figure S6

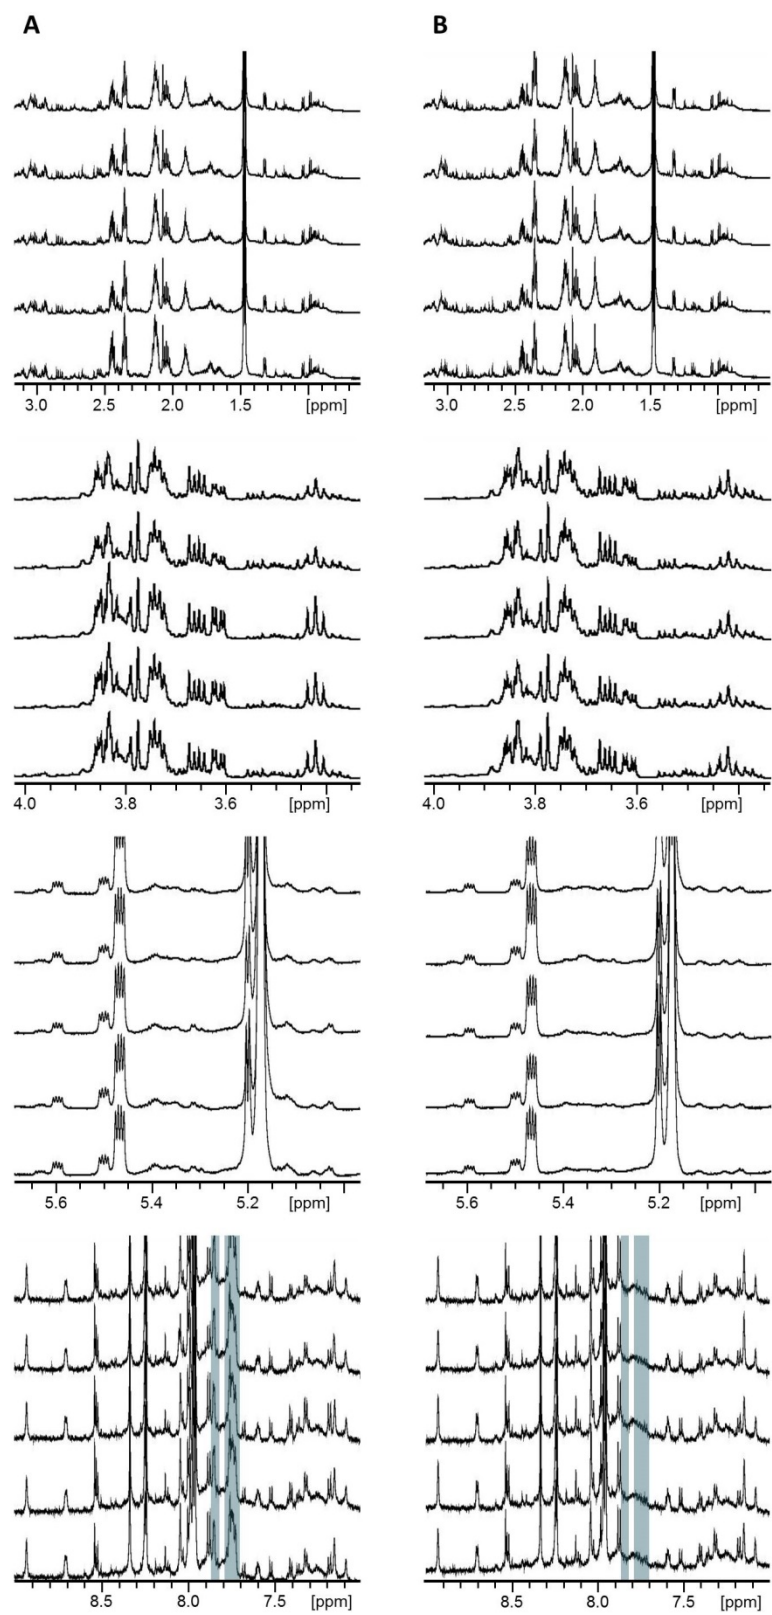

**Figure S6. Overlays of  $^1\text{H}$  NMR spectra for all five replicates of strain *ptcu-1\_1.5*.** The region of the spectra containing the BCS resonances are highlighted in blue. Each spectral region is scaled to compensate for differences in resonance intensity.

**A. Spectra measured for biological replicates of *ptcu-1\_1.5* cultured on VM-BCS.**

**B. Spectra measured for biological replicates of *pnit-6\_1.5* cultured on VM-Cu.** Note the absence of the BCS resonances observed between 7.7 and 7.9 ppm in **A**.
